# Supplementary material for: Causes of America’s Lagging Life Expectancy: An International Comparative Perspective
Source: PubMed Central journal article supplement — J Gerontol B Psychol Sci Soc Sci. 2022 Feb 21;77(Suppl 2):S117–26. doi: 10.1093/geronb/gbab129 (PMC9154274; doi:10.1093/geronb/gbab129), 2022-02-21
Supplement: gbab129_suppl_supplementary_material.pdf [file gbab129_suppl_supplementary_material.pdf]

## Supplementary Materials

**Supplementary Table 1.** ICD-10 Codes for 16 Cause of Death Categories

| Cause of Death Category                                            | ICD-10 Codes                                                                                                                                              |
|--------------------------------------------------------------------|-----------------------------------------------------------------------------------------------------------------------------------------------------------|
| Alcohol-induced*                                                   | E24.4, F10, G31.2, G62.1, G72.1, I42.6, K29.2, K70, K85.2, K86, R78.0, X45, X65, Y15                                                                      |
| Alzheimer's disease                                                | G30                                                                                                                                                       |
| Circulatory diseases                                               | I00–I99, excluding I42.6                                                                                                                                  |
| Diabetes                                                           | E10–E14                                                                                                                                                   |
| Drug overdose                                                      | X40–X44, X60–X64, X85, Y10–Y14                                                                                                                            |
| Firearm-related                                                    | W32–W34, X72–X74, X93–X95, Y22–Y24, Y35.0                                                                                                                 |
| Homicide**                                                         | X85–Y09, excluding X85, X93–X95                                                                                                                           |
| Infectious and parasitic diseases                                  | A00–B99                                                                                                                                                   |
| Lung cancer                                                        | C33–C34                                                                                                                                                   |
| Mental and behavioral disorders and diseases of the nervous system | F00–F99, G00–G99, excluding F10, G30, G31.2, G62.1, G72.1                                                                                                 |
| Motor vehicle accidents                                            | V02–V04, V09.0, V09.2, V12–V14, V19.0–V19.2, V19.4–V19.6, V20–V79, V80.3–V80.5, V81.0–V81.1, V82.0–V82.1, V83–V86, V87.0–V87.8, V88.0–V88.8, V89.0, V89.2 |
| Perinatal conditions and congenital anomalies                      | P00–P96, Q00–Q99                                                                                                                                          |
| Residual                                                           | All remaining causes of death                                                                                                                             |
| Respiratory diseases                                               | J00–J99                                                                                                                                                   |
| Screenable/treatable cancers                                       | C18–C21, C50, C53, C61                                                                                                                                    |
| Suicide**                                                          | X60–X84, excluding X60–X64, X65, X72–X74                                                                                                                  |

*Notes:* The cause of death categories are mutually exclusive and exhaustive.

\* Alcohol-induced causes are excluded from all overlapping categories.

\*\* Excludes drug-related and firearm-related homicides and suicides, which are included in the drug overdose and firearm-related deaths categories.

**Supplementary Table 2.** Contribution of 16 Causes of Death (Years) to Average U.S. Shortfall in Life Expectancy at Birth, Men and Women, 2016

| <b>Cause of Death</b>                                                  | <b>Men</b>  | <b>Women</b> |
|------------------------------------------------------------------------|-------------|--------------|
| 1. Drug overdose                                                       | 0.62        | 0.35         |
| 2. Firearm-related                                                     | 0.54        | 0.11         |
| 3. Homicide                                                            | 0.04        | 0.03         |
| 4. Alcohol-induced                                                     | 0.10        | 0.06         |
| 5. Motor vehicle accidents                                             | 0.34        | 0.18         |
| 6. Circulatory diseases                                                | 1.13        | 0.99         |
| 7. Respiratory diseases                                                | 0.11        | 0.41         |
| 8. Diabetes                                                            | 0.21        | 0.17         |
| 9. Alzheimer's disease                                                 | 0.15        | 0.39         |
| 10. Mental and behavioral disorders and diseases of the nervous system | 0.21        | 0.34         |
| 11. Suicide                                                            | -0.10       | -0.05        |
| 12. Perinatal conditions and congenital anomalies                      | 0.11        | 0.12         |
| 13. Infectious and parasitic diseases                                  | 0.19        | 0.18         |
| 14. Lung cancer                                                        | -0.04       | 0.21         |
| 15. Screenable/treatable Cancers                                       | -0.10       | -0.06        |
| 16. Residual                                                           | 0.01        | 0.12         |
| <b>U.S. Shortfall (Years)</b>                                          | <b>3.51</b> | <b>3.56</b>  |

*Notes:* The cause of death categories are mutually exclusive and exhaustive. Estimates correspond to the bars labeled “Average” in Figure 3 of the main text.
